# Supplementary material for: Nucleoside analogs in ADAR guide strands targeting 5′-UA sites
Source: Royal Society of Chemistry journal article supplement (doi:10.1039/d2cb00165a), 2022-10-31
Supplement: d2cb00165a1.pdf [file d2cb00165a1.pdf]

Supporting information:

# Nucleoside Analogs in ADAR Guide Strands Targeting 5'-UA sites

Hannah F. Brinkman, Victorio Jauregui Matos, Herra G. Mendoza, Erin E. Doherty  
and Peter A. Beal \*

Department of Chemistry, University of California, One Shields Avenue, Davis, CA 95616, United  
States

## Contents of Supporting Information:

|                        |   |
|------------------------|---|
| <b>Table S1</b> .....  | 2 |
| <b>Table S2</b> .....  | 2 |
| <b>Table S3</b> .....  | 3 |
| <b>Table S4</b> .....  | 3 |
| <b>Table S5</b> .....  | 3 |
| <b>Table S6</b> .....  | 4 |
| <b>Table S7</b> .....  | 4 |
| <b>Table S8</b> .....  | 4 |
| <b>Table S9</b> .....  | 6 |
| <b>Figure S1</b> ..... | 7 |
| <b>Figure S2</b> ..... | 7 |

**Table S1.** Average  $\chi$  angle of the -1 position across ADAR2 crystal structures (5ED1, 5ED2, 5HP2, 5HP3, 6D06, 6VFF, 7KFN), A-form -1 position, and the average of other adenosines in ADAR2d WT Bdf2-U structure (5HP2).

| Measured Adenosine          | $\chi$ angle |
|-----------------------------|--------------|
| Average -1 position         | $-90 \pm 6$  |
| A-Form -1 position          | -157         |
| Average of other adenosines | $-160 \pm 7$ |

**Table S2.** The effect of -1 gRNA modifications on fitted end points and observed rate constants for ADAR2 deamination reactions with *MECP2*.<sup>a</sup>

| -1 modification <sup>a</sup> | Fitted end point (%) <sup>b</sup> | $k_{\text{obs}}$ (min <sup>-1</sup> ) <sup>b</sup> | $k_{\text{rel}}$ <sup>c</sup> |
|------------------------------|-----------------------------------|----------------------------------------------------|-------------------------------|
| Adenosine                    | $96.2 \pm 0.6$                    | $0.3 \pm 0.1$                                      | 1                             |
| dA                           | $95.2 \pm 0.1$                    | $0.7 \pm 0.3$                                      | 2.3                           |
| 2'-O-Me A                    | $93.8 \pm 1.0$                    | $0.4 \pm 0.2$                                      | 1.3                           |
| LNA A                        | no reaction                       | no reaction                                        | no reaction                   |
| UNA A                        | $87.2 \pm 0.7$                    | $0.061 \pm 0.006$                                  | 0.2                           |
| 2'-F A                       | $94 \pm 1$                        | $0.18 \pm 0.02$                                    | 0.6                           |
| FANA A                       | $94.6 \pm 0.3$                    | $1.0 \pm 0.1$                                      | 3.3                           |
| $\beta$ -L-dA                | $78.6 \pm 0.9$                    | $0.031 \pm 0.003$                                  | 0.1                           |
| C3 spacer                    | $55.1 \pm 0.5$                    | $0.17 \pm 0.02$                                    | 0.6                           |
| 2-aminopurine                | $90 \pm 2$                        | $0.071 \pm 0.008$                                  | 0.2                           |
| 2,6-diaminopurine            | $90 \pm 1$                        | $0.076 \pm 0.003$                                  | 0.3                           |
| dI                           | $93.0 \pm 0.6$                    | $0.42 \pm 0.04$                                    | 1.4                           |
| dN                           | $94.7 \pm 0.6$                    | $0.59 \pm 0.09$                                    | 2.0                           |
| 7-deaza-dA                   | $94.5 \pm 0.2$                    | $0.68 \pm 0.07$                                    | 2.3                           |
| 3-deaza-dA                   | $90.2 \pm 0.4$                    | $0.5 \pm 0.1$                                      | 1.7                           |
| dC                           | $76 \pm 1$                        | $0.0317 \pm 0.0008$                                | 0.1                           |
| Abasic                       | $53.9 \pm 1.0$                    | $0.051 \pm 0.001$                                  | 0.2                           |
| dN -1, LNA -6                | $92.8 \pm 0.2$                    | $1.72 \pm 0.07$                                    | 5.7                           |
| Orphan dZ                    | $69 \pm 2$                        | $0.41 \pm 0.09$                                    | 1.4                           |
| Orphan dZ, dN -1             | $74.7 \pm 0.6$                    | $1.4 \pm 0.2$                                      | 4.7                           |

<sup>a</sup> Reactions were carried out with 5 nM of target RNA and 15 nM ADAR2 WT

<sup>b</sup> Reactions were fitted to the equation  $[P]_t = \alpha[1 - \exp(-k_{\text{obs}} \cdot t)]$

<sup>c</sup>  $k_{\text{rel}} = k_{\text{obs}}$  for modification/ $k_{\text{obs}}$  for adenosine

**Table S3.** The effect of -1 gRNA modifications on observed rate constants for ADAR1 deamination reactions with *MECP2*.<sup>a</sup>

| -1 modification <sup>a</sup> | $k_{\text{obs}} \times 10^{-2} (\text{min}^{-1})^{\text{b}}$ | $k_{\text{rel}}^{\text{c}}$ |
|------------------------------|--------------------------------------------------------------|-----------------------------|
| Adenosine                    | 0.22 ± 0.02                                                  | 1                           |
| dA                           | 1.2 ± 0.2                                                    | 5.5                         |
| 2'-O-Me A                    | 0.17 ± 0.02                                                  | 0.77                        |
| LNA A                        | no reaction                                                  | no reaction                 |
| UNA A                        | no reaction                                                  | no reaction                 |
| 2'-F A                       | 0.11 ± 0.01                                                  | 0.50                        |
| FANA A                       | 0.79 ± 0.04                                                  | 3.6                         |
| dN                           | 4.3 ± 0.7                                                    | 20                          |
| 7-deaza-dA                   | 1.05 ± 0.06                                                  | 4.8                         |
| Orphan dZ                    | 0.36 ± 0.01                                                  | 1.6                         |
| Orphan dZ, dN -1             | 1.89 ± 0.07                                                  | 8.6                         |

<sup>a</sup> Reactions were carried out with 15 nM of target RNA and 150 nM ADAR1 p110

<sup>b</sup> Reactions were fitted to the equation  $[P]_t = \alpha[1 - \exp(-k_{\text{obs}} \cdot t)]$ . End point was constrained to 65%

<sup>c</sup>  $k_{\text{rel}} = k_{\text{obs}}$  for modification/ $k_{\text{obs}}$  for adenosine

**Table S4.** The effect of -1 gRNA modifications on fitted end points and observed rate constants for ADAR2 deamination reactions with *IDUA*.<sup>a</sup>

| -1 modification <sup>a</sup> | Fitted end point <sup>b</sup> | $k_{\text{obs}} (\text{min}^{-1})^{\text{b}}$ | $k_{\text{rel}}^{\text{c}}$ |
|------------------------------|-------------------------------|-----------------------------------------------|-----------------------------|
| Adenosine                    | 94.6 ± 0.4                    | 0.59 ± 0.01                                   | 1                           |
| dA                           | 95.6 ± 0.1                    | 0.6 ± 0.2                                     | 1                           |
| dN                           | 92.3 ± 0.7                    | 1.2 ± 0.2                                     | 2.0                         |
| 7-deaza-dA                   | 94.7 ± 0.4                    | 0.59 ± 0.03                                   | 1.0                         |

<sup>a</sup> Reactions were carried out with 5 nM of target RNA and 15 nM ADAR2 WT

<sup>b</sup> Reactions were fitted to the equation  $[P]_t = \alpha[1 - \exp(-k_{\text{obs}} \cdot t)]$

<sup>c</sup>  $k_{\text{rel}} = k_{\text{obs}}$  for modification/ $k_{\text{obs}}$  for adenosine

**Table S5.** The effect of -1 gRNA modifications on observed rate constants and fitted end points for ADAR1 deamination reactions with *IDUA*.<sup>a</sup>

| -1 modification <sup>a</sup> | Fitted end point <sup>b</sup> | $k_{\text{obs}} \times 10^{-2} (\text{min}^{-1})^{\text{b}}$ | $k_{\text{rel}}^{\text{c}}$ |
|------------------------------|-------------------------------|--------------------------------------------------------------|-----------------------------|
| Adenosine                    | 66 ± 2                        | 4.1 ± 0.2                                                    | 1                           |
| dA                           | 66 ± 2                        | 4.2 ± 0.3                                                    | 1.0                         |
| dN                           | 79 ± 1                        | 17.5 ± 0.4                                                   | 4.3                         |
| 7-deaza-dA                   | 73 ± 1                        | 8.0 ± 0.8                                                    | 2.0                         |

<sup>a</sup> Reactions were carried out with 15 nM of target RNA and 150 nM ADAR1 p110

<sup>b</sup> Reactions were fitted to the equation  $[P]_t = \alpha[1 - \exp(-k_{\text{obs}} \cdot t)]$

<sup>c</sup>  $k_{\text{rel}} = k_{\text{obs}}$  for modification/ $k_{\text{obs}}$  for adenosine



|                                                                                                    |                                                                                                   |
|----------------------------------------------------------------------------------------------------|---------------------------------------------------------------------------------------------------|
| Mouse <i>IDUA</i> W392X gRNAs                                                                      | 5' -UUGAGACCUCUGCCC [A] GAGUUGUUCUCCA-3'                                                          |
| Human <i>ACTB</i> gRNAs                                                                            | 5' -GGGUGUAACGCAACC [A] AGUCAUAGUCCGC-3'                                                          |
| Human <i>MECP2</i> W104X cellular guides                                                           | 5' - <u>UUUCCUUUGCUUAAGCUUCCGUGUCC</u> [A] <u>GCCUUCAGGC</u> -3'                                  |
| Standard DNA oligo sequence for MALDI                                                              | 5' -TTACGCCAGAATGCGTTCGCACAGCCGCCA-3'                                                             |
| <i>MECP2</i> RT-PCR and sequencing primer forward                                                  | 5' -AGAGGCAGGCAAAGCAGA-3'                                                                         |
| <i>MECP2</i> amplification and RT-PCR primer reverse                                               | 5' -TCATTAGGGTCCAGGGAT-3'                                                                         |
| <i>MECP2</i> T7 DNA amplification forward                                                          | 5' -TAATACGACTCACTATAGGGAGC-3'                                                                    |
| <i>IDUA</i> RT-PCR primer forward                                                                  | 5' -CTCCCATCCTGTGGGCT-3'                                                                          |
| <i>IDUA</i> amplification, RT-PCR and sequencing primer reverse                                    | 5' -GGATCCGGGTGTGC-3'                                                                             |
| <i>IDUA</i> T7 DNA amplification forward                                                           | 5' -TAATACGACTCACTATAGGGCTC-3'                                                                    |
| <i>ACTB</i> RT-PCR and sequencing primer forward                                                   | 5' -GTCACCTTCACCGTTCCA-3'                                                                         |
| <i>ACTB</i> amplification and RT-PCR primer reverse                                                | 5' -TCCTCCTGAGCGCAAG-3'                                                                           |
| <i>ACTB</i> T7 DNA amplification forward                                                           | 5' -TAATACGACTCACTATAGGGTCCT-3'                                                                   |
| <i>MECP2</i> W104X sequence for dual luciferase assay reporter plasmid (target A indicated in red) | 5' -CGCTCCATCATCCGTGACCGGGACCCATGTATGATGACCCCACCCCTGCCTGAAGGCTAGACACGGAAGCTTAAGCAAAGGAAATCTGGC-3' |
| RT-PCR forward primer for sequencing of cellular editing                                           | 5' -CTGCTTACTGGCTTATCGAAATTAATACGACT-3'                                                           |
| RT-PCR reverse primer for sequencing of cellular editing                                           | 5' -TTACGCCAGAATGCGTTCGCACAGCCGCCA-3'                                                             |
| Nested PCR and sequencing forward primer for sequencing of cellular editing                        | 5' -CACTATAGGGAGACCCAAGCTTGCCAC-3'                                                                |
| Nested PCR reverse primer for sequencing of cellular editing                                       | 5' -GCCGGTCACTCCGTTGATGGTTACT-3'                                                                  |

**Table S9.** Masses of gRNAs and guide oligonucleotides (cellular).

| gRNA                              | Calculated Mass (Da) | Observed Mass (Da) |
|-----------------------------------|----------------------|--------------------|
| <i>MECP2</i> rA -1                | 9231                 | 9240               |
| <i>MECP2</i> dA -1                | 9215                 | 9224               |
| <i>MECP2</i> 2'-O-Me -1           | 9245                 | 9248               |
| <i>MECP2</i> LNA A -1             | 9243                 | 9236               |
| <i>MECP2</i> UNA A -1             | 9238                 | 9238               |
| <i>MECP2</i> 2'-F A -1            | 9233                 | 9230               |
| <i>MECP2</i> 2'-F-arabino A -1    | 9233                 | 9224               |
| <i>MECP2</i> $\beta$ -L-dA -1     | 9215                 | 9221               |
| <i>MECP2</i> C3 spacer -1         | 9040                 | 9035               |
| <i>MECP2</i> 2-aminopurine -1     | 9231                 | 9229               |
| <i>MECP2</i> 2,6-diaminopurine -1 | 9246                 | 9240               |
| <i>MECP2</i> dI -1                | 9216                 | 9215               |
| <i>MECP2</i> dN -1                | 9200                 | 9205               |
| <i>MECP2</i> 7-deaza-dA -1        | 9214                 | 9225               |
| <i>MECP2</i> 3-deaza-dA -1        | 9214                 | 9225               |
| <i>MECP2</i> dC -1                | 9191                 | 9198               |
| <i>MECP2</i> abasic -1            | 9082                 | 9097               |
| <i>MECP2</i> LNA -6, dN -1        | 9212                 | 9228               |
| <i>MECP2</i> orphan dZ            | 9259                 | 9242               |
| <i>MECP2</i> orphan dZ, dN -1     | 9228                 | 9227               |
| <i>IDUA</i> rA -1                 | 9153                 | 9144               |
| <i>IDUA</i> dA -1                 | 9137                 | 9137               |
| <i>IDUA</i> dN -1                 | 9122                 | 9123               |
| <i>IDUA</i> 7-deaza-dA -1         | 9136                 | 9141               |
| <i>ACTB</i> rA -1                 | 9301                 | 9297               |
| <i>ACTB</i> dA -1                 | 9285                 | 9280               |
| <i>ACTB</i> dN -1                 | 9270                 | 9272               |
| <i>MECP2</i> LNA A -1 (cellular)  | 12350                | 12350              |
| <i>MECP2</i> dN -1 (cellular)     | 12307                | 12307              |
| <i>MECP2</i> 2'-F A -1 (cellular) | 12340                | 12340              |
| <i>MECP2</i> FANA A -1 (cellular) | 12340                | 12340              |

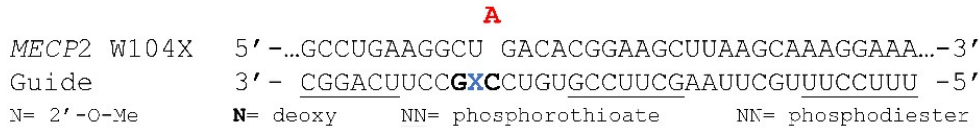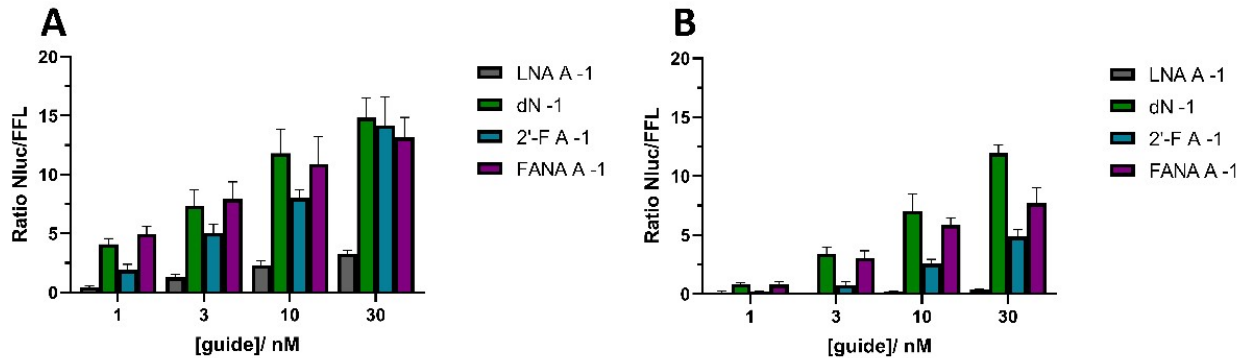

**Figure S1.** Concentration dependence of effect of -1 nucleoside analogs on cellular editing as measured by dual luciferase assay. Relative ratio of Nluc/FFL was measured in HEK293T cells with varying concentrations of guide oligonucleotides with four different -1 analogs with overexpressed (A) ADAR2 or (B) ADAR1. Error bars, s.d. ( $n \geq 5$  biological replicates). A Grubbs test for outliers was conducted at  $p = 0.05$  significance level.

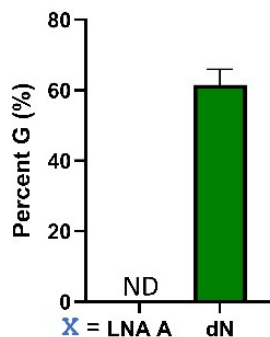

**Figure S2.** Effect of -1 nucleoside analogs on cellular editing as measured by Sanger sequencing. The percent G at the *MECP2* W104X target site was measured in HEK293T cells after transfection of 30 nM of -1 nucleoside analog containing guide oligonucleotide with overexpressed ADAR1. Error bars, s.d. ( $n = 3$  biological replicates). ND = no detected editing.
