# Supplementary figures and images for: Nucleoside analogs in ADAR guide strands targeting 5′-UA sites
Source: Royal Society of Chemistry journal article supplement (doi:10.1039/d2cb00165a), 2022-10-31

Figure S1

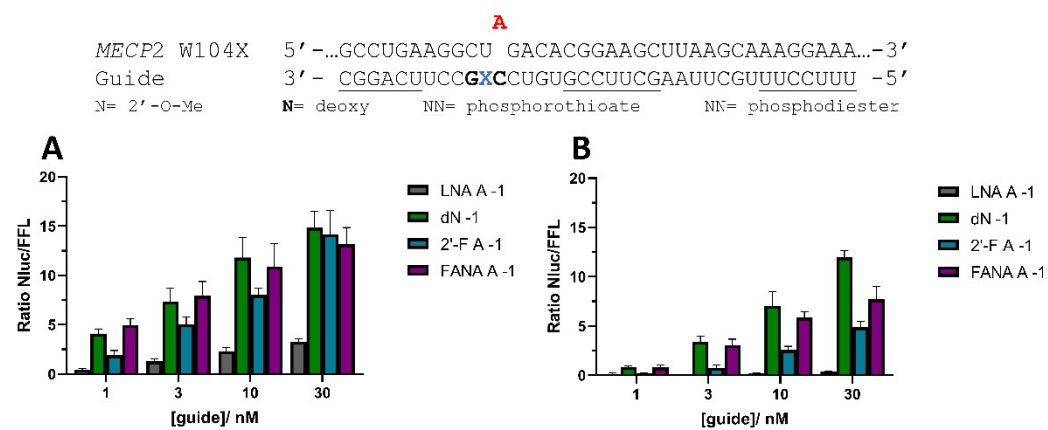

Figure S2

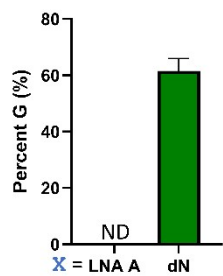

Supplement: d2cb00165a2.pdf [file d2cb00165a2.pdf]
